# Supplementary material for: Cytotoxicity and Changes in Gene Expression Under Aluminium Potassium Sulfate on Spodoptera Frugiperda 9 Cells
Source: Research Square preprint supplement (doi:10.21203/rs.3.rs-316200/v1), 2021-03-22
Supplement: Supplementary file 1 [file 4ae35bd438d368cc34758b5b.docx]

Table S1. Statistical table of AO/EB staining numbers under different aluminum concentrations

| Concentration  (μg/ml) | Number of green | Number of red/orange |
| --- | --- | --- |
| 0 | 186.72±14.77a | 24.44±5.26b |
| 0.45 | 141.84±19.71b | 64.50±11.57a |
| 0.9 | 99.78±9.04c | 56.22±12.46a |
| 2.25 | 18.61±8.49d | 45.28±12.07ab |

Pick six different positions for each hole (from top to bottom on the two sides of the axis of symmetry of each

hole, a total of 6 points, not near the edge of the hole) and count green, orange or red, respectively. Above is

the count statistical results a, b, c, d in the second column and a, b in the third column represent significant

differences, p < 0.05.

Table S2 Statistical table of cells in different apoptotic cycles under different aluminum concentrations

| Concentration  (μg/ml) | Normal cells(100%) | Early apoptotic cells(100%) | Late apoptotic cells(100%) | Damaged cells(100%) |
| --- | --- | --- | --- | --- |
| 0 | 96.15±2.64a | 0.88±0.29 | 1.98±1.85a | 0.99±0.60 |
| 4.5×10-3 | 84.16±5.77b | 2.21±1.36 | 10.38±2.39a | 3.25±2.07 |
| 4.5×10-2 | 75.59±6.12bc | 3.51±2.62 | 16.25±2.66b | 4.66±2.40 |
| 4.5×10-1 | 68.38±7.13c | 6.4±4.24 | 20.28±3.31c | 4.94±2.36 |

The proportion of cells in each stage of apoptosis was counted for statistical analysis. And the result was

shown above. a, b, c in the second and fourth column represent significant differences, p< 0.05.
